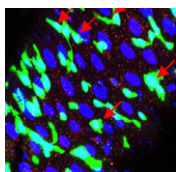

### Translating *Apc1* loss into intestinal proliferation

Most colorectal cancers carry inactivating mutations in adenomatous polyposis coli (*APC*), a negative regulator of Wnt signalling. Moreover, in mice, *Apc* inactivation is sufficient to drive intestinal hyperplasia. Now, Julia Cordero, Owen Sansom and colleagues use the adult *Drosophila* midgut to identify the signalling pathways that mediate intestinal hyperplasia following *Apc* loss (see p. 4524). The researchers show that the Wnt target *Myc* is required for *Drosophila* intestinal stem cell (ISC) hyperproliferation following *Apc1* loss. *Egfr* and *Jak/Stat* signalling are both activated in a *Myc*-dependent manner following *Apc1* loss, they report, and are required to drive ISC hyperproliferation. Notably, *Apc1* loss in ISCs results in non-cell-autonomous upregulation of the interleukin-like ligands *Upd2/3* in enterocytes and subsequent activation of *Jak/Stat* signalling in ISCs. These and other findings indicate that non-cell-autonomous crosstalk between the Wnt/*Myc*, *Egfr* and *Jak/Stat* signalling pathways regulates intestinal hyperproliferation in the *Drosophila* midgut following *Apc1* loss and suggest that these pathways may also be activated in human colorectal cancers.

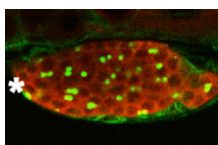

### Maelstrom regulation of oocyte determination

The conserved protein Maelstrom has multiple functions during *Drosophila* oogenesis. It is a component of the perinuclear nuage, a germline structure in which the piRNAs that are required for transposon silencing are produced. In addition, Maelstrom localised within the nucleus promotes germline stem cell differentiation by repressing expression of the microRNA miR-7. Here (p. 4505), Toshie Kai and co-workers describe a third way in which Maelstrom regulates oogenesis. They show that Maelstrom is phosphorylated in *Drosophila* ovaries and identify its conserved serine 138 residue as the phosphorylation site. Maelstrom phosphorylation, they report, is required for oocyte determination but not for transposon silencing or for germline stem cell differentiation. They also show that phosphorylation of Maelstrom represses the pachytene checkpoint (one of the two meiotic checkpoints in *Drosophila*), in part through downregulation of the checkpoint protein Sir2, and identify Polo as a kinase that mediates Maelstrom phosphorylation. Thus, the researchers propose, Polo-mediated phosphorylation of Maelstrom regulates oocyte determination in *Drosophila* ovaries by inactivating the pachytene checkpoint.

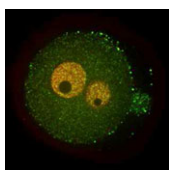

### Key role for LIN28 in nucleogenesis

A functional nucleolus (the organelle that makes ribosome subunits) is essential for embryonic development. Nucleogenesis, which involves transformation of an inactive nucleolar precursor body (NBP) into a mature nucleolus, coincides with embryonic genome activation, which occurs at the late 2-cell stage in mouse embryos. Here (p. 4514), Edgar Vogt, Rüdiger Behr and colleagues investigate the involvement of the pluripotency factor LIN28 in nucleogenesis in mouse embryos. LIN28, which is abundantly expressed in early embryonic tissue, is an RNA-binding protein that can contribute to the reprogramming of somatic cells to pluripotent stem cells. The researchers report that LIN28 accumulates at the periphery of NPBs and mature nucleoli in preimplantation embryos and that initiation of LIN28 expression coincides with embryonic genome activation. Following LIN28 knockdown, they report, most embryos arrest between the 2- and 4-cell stages. Notably, presumptive NPB sites are not enriched with the nucleolar marker nucleophosmin in these arrested embryos. Thus, the researchers conclude, LIN28 is essential for NPB assembly and nucleogenesis during early embryonic development.

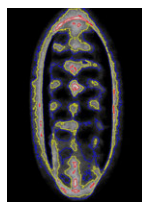

### Touch-sensitive morphogenesis

Contact inhibition of locomotion was first described more than 50 years ago by Michael Abercrombie, who reported that migrating fibroblasts change direction and migrate away from each other when they collide. Although little is known about contact inhibition *in vivo*, it was recently reported that contact inhibition helps to drive the uniform embryonic dispersal of *Drosophila* macrophages (haemocytes). Now, Graham Dunn, Brian Stramer and colleagues (p. 4555) mathematically analyse and simulate the contact repulsion dynamics of haemocytes moving along the ventral surface of the *Drosophila* embryo to investigate the involvement of contact inhibition in the patterning of haemocyte movements. Their simulation, which they test experimentally, reveals that the final pattern of haemocyte distribution, as well as the timing of pattern formation, can be explained by contact inhibition dynamics within the geometry of the *Drosophila* embryo, irrespective of external cues. This finding has broad implications for morphogenesis because it suggests that contact inhibition of locomotion can be a significant driving force for embryonic pattern formation.

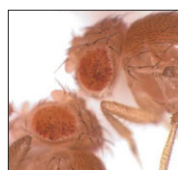

### PBAP sets the (chromatin) boundaries

The establishment of chromatin boundaries (transcriptional regulatory elements that counteract the spreading of silent chromatin) is essential for proper development. At these boundaries, the histone variant H3.3 replaces H3.1 in a process that, in *Drosophila*, involves the sequence-specific DNA-binding protein GAGA factor, the chromatin remodelling complex FACT, and the H3.3-specific chaperone HIRA. The H3.3 replacement is also likely to require an ATP-dependent remodelling factor and, on p. 4582, Susumu Hirose and colleagues identify this factor. The researchers show that GAGA factor associates with the Polybromo-associated Brm (PBAP) remodelling complex, which consists of several Trithorax group proteins, and recruits it to chromatin boundaries in *Drosophila*. They further show that mutations in GAGA factor, Brm and Polybromo/Bap180 disrupt H3.3 replacement and boundary function in a synergistic manner. Moreover, PBAP is needed to generate a DNase-hypersensitive site at the *d1* chromatin boundary and HIRA reverses this alteration. Based on these results, the researchers propose a model for H3.3 replacement at chromatin boundaries.

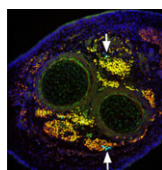

### Notch muscles in on myogenesis

The capacity of stem cells to generate successive classes of committed progeny during development has been well-studied in some systems but is largely undefined for many tissues. Now, on p. 4536, Shahragim Tajbakhsh and co-workers investigate the role of Notch in the temporal specification potential of mouse skeletal muscle stem cells. The researchers show that Notch is active throughout development in the muscle founder stem cell population, and that expression of activated Notch (NICD) is sufficient to autonomously maintain self-renewing muscle stem/progenitor cells throughout embryogenesis, despite the absence of committed progeny, which were previously shown to be required for muscle stem cell maintenance. NICD-expressing replicating embryonic stem/progenitors respond to foetal environmental cues as development proceeds. Furthermore, the researchers report, siRNA-mediated silencing of NICD in this population promotes the temporally appropriate foetal myogenic fate, despite the expression of markers for multiple cell types. Given these results, the researchers propose that Notch signalling both maintains muscle stem cells and allows them to be receptive to specification cues throughout development.

Jane Bradbury
